# Supplementary material for: Meta-Analysis of Quantitative Trait Loci Associated with Seedling-Stage Salt Tolerance in Rice (Oryza sativa L.)
Source: MDPI journal article supplement (doi:10.3390/plants8020033), 2019-01-29
Supplement: s1 [file s1]

Figure 1: Schematic representation of the four chromosomes of the genome of the bacterium. The figure shows four chromosomes (1, 2, 3, 4) as horizontal bars with varying lengths and internal structures. Chromosome 1 is the largest, followed by 2, 3, and 4. Each chromosome is labeled with its size in kb at the top and bottom. The top labels are in black, and the bottom labels are in red. The chromosomes are color-coded: Chromosome 1 is blue, Chromosome 2 is green, Chromosome 3 is orange, and Chromosome 4 is yellow. The chromosomes are arranged in a circular fashion, with Chromosome 1 at the top, 2 on the left, 3 on the right, and 4 at the bottom. The chromosomes are connected by lines, indicating their relative positions and sizes. The figure also includes a scale bar at the bottom, ranging from 0 to 365,000 kb.

consensus

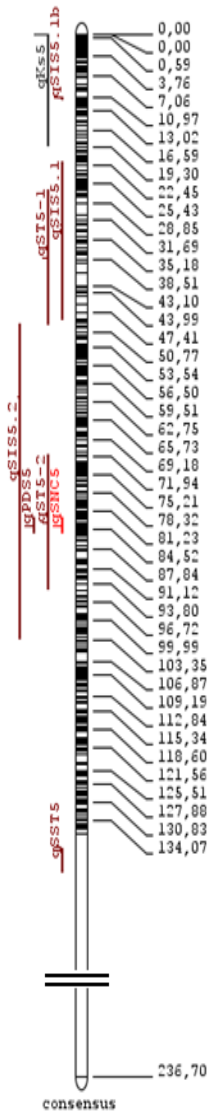

5

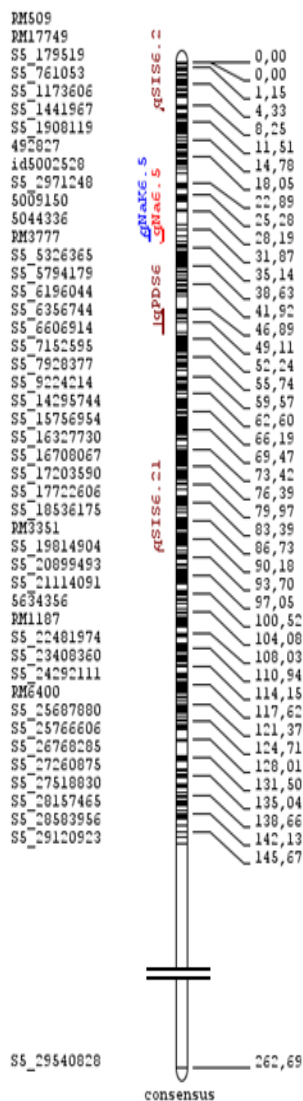

6

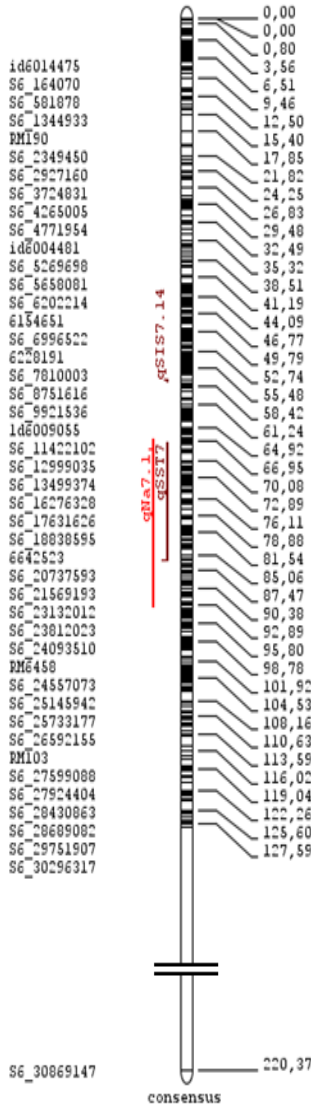

7

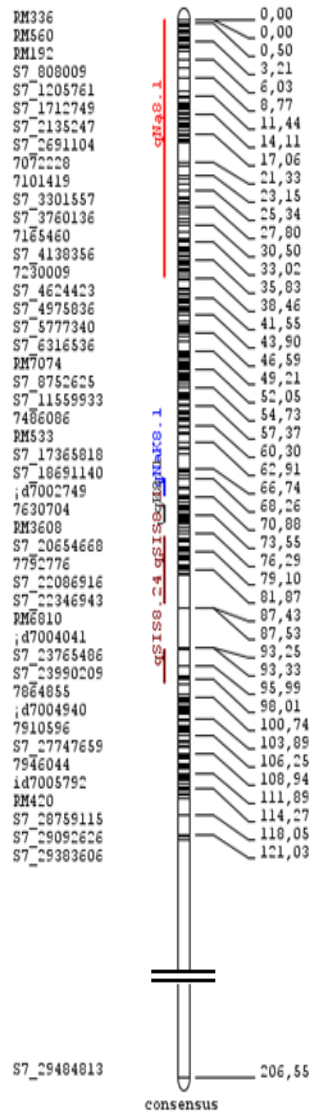

8

PM5911  
PM2344  
PM2680  
0004315  
0024868  
0046012  
S8\_1090318  
S8\_1541432  
S8\_2160050  
0149888  
S8\_2949645  
S8\_3283455  
S8\_3501665  
id8002314  
PM3572  
0316836  
S8\_5140943  
S8\_5418220  
S8\_7668333  
0434772  
PM6429  
S8\_16048483  
PM331  
S8\_19191663  
S8\_20060711  
S8\_20830908  
0645127  
S8\_21318453  
S8\_21613952  
S8\_22285784  
PM223  
PM5637  
S8\_23614171  
08139985  
PM556  
S8\_24738259  
PM8043  
0928819  
0938168  
id8006885  
S8\_25717532  
S8\_26269644  
S8\_26796602  
S8\_27613462  
S8\_28201866  
PM8045  
PM3120  
PM5545

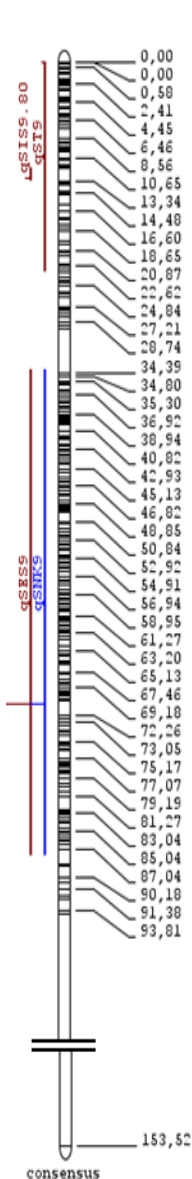

9

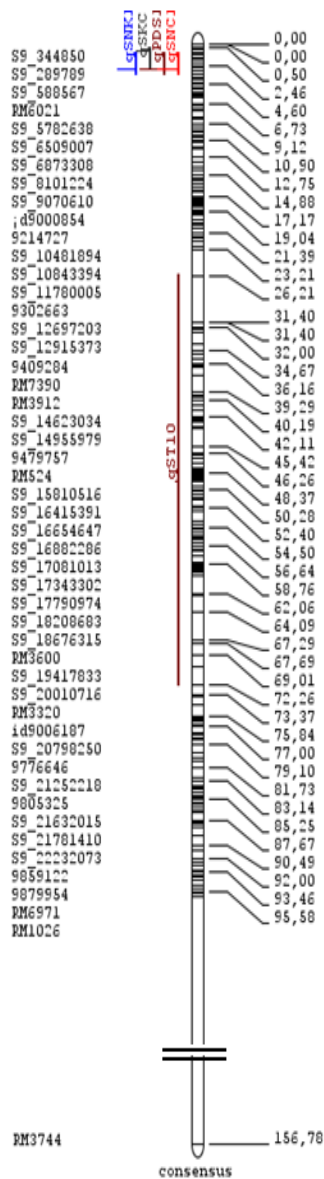

10

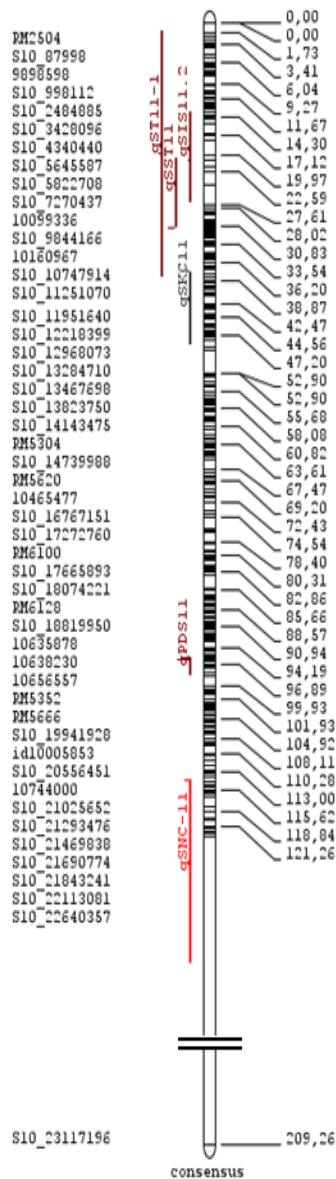

11

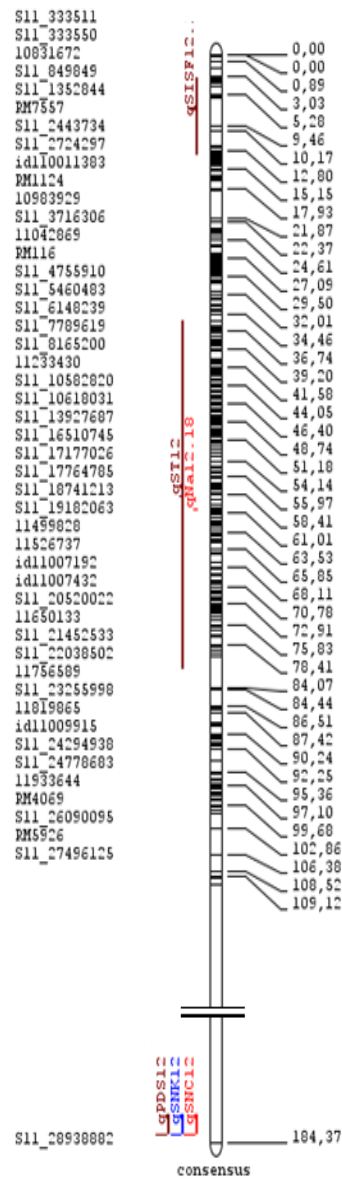

12
